# Supplementary material
Source: Springer Nature journal article supplement (https://www.springermedizin.de/resource/supplementary/13014_2005_7_MOESM2_ESM.pdf/9632806)

# local disease free survival

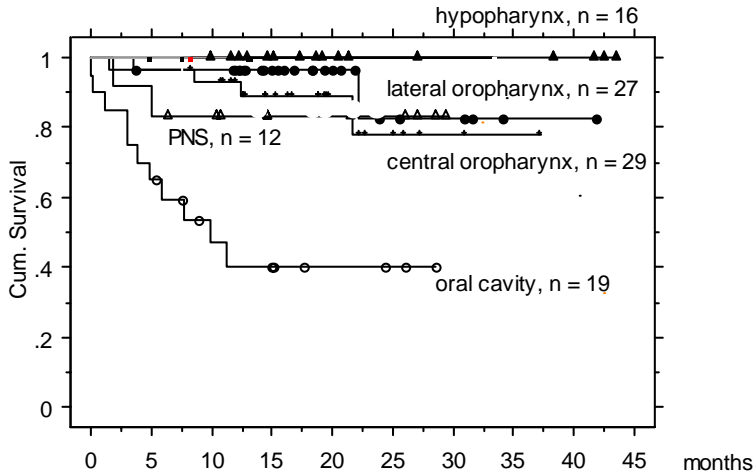

Supplement: MOESM2 [file 9632806]
